# Supplementary material for: Predictive value of abdominal wall scar score for pelvic floor function rehabilitation, vaginal microecology and complications after cesarean section
Source: PeerJ. 2023 Sep 15;11:e16012. doi: 10.7717/peerj.16012 (PMC10506580; doi:10.7717/peerj.16012)
Supplement: Supplemental Information 1 [file peerj-11-16012-s001.xlsx]

## Sheet: Observers
								Class I and II muscle fiber force grade and pelvic floor muscle potential				Vaginal Microecology
	Number	Age (years)	Gestational age (weeks)	Height (cm)	Weight (kg)	Number of pregnancies	Operation time (min)	Class I muscle fiber strength grade	Class II muscle fiber strength grade	Pelvic floor muscle potential	Pelvic floor dysfunction score	PH	H2O2	LE	SNA	β-GD	NAG	Complication
	1	30	38	160.6	51.31	2	115	0 Level	Ⅲ Grade	24	24	Abnormal	Abnormal	Normal	Abnormal	Normal	Normal
	2	33	38	154.1	65.21	2	40	Ⅳ Grade	Ⅳ Grade	23	37	Abnormal	Abnormal	Abnormal	Normal	Normal	Normal
	3	23	39	162	54.61	2	70	Ⅳ Grade	Ⅴ Grade	27	42	Abnormal	Normal	Normal	Normal	Normal	Normal
	4	30	41	163.8	52.16	3	79	0 Level	Ⅲ Grade	23	39	Abnormal	Abnormal	Normal	Normal	Normal	Abnormal
	5	29	38	170.8	54.14	2	98	Ⅳ Grade	Ⅲ Grade	23	38	Abnormal	Normal	Abnormal	Abnormal	Normal	Abnormal
	6	25	40	157	50.41	2	40	Ⅲ Grade	Ⅲ Grade	27	34	Abnormal	Abnormal	Abnormal	Normal	Normal	Abnormal
	7	27	39	143	48.58	2	100	Ⅴ Grade	Ⅴ Grade	26	35	Abnormal	Abnormal	Abnormal	Normal	Normal	Normal
	8	29	41	152.4	73.12	2	53	Ⅲ Grade	Ⅴ Grade	27	36	Normal	Abnormal	Normal	Normal	Normal	Abnormal
	9	37	38	168.2	67.26	2	88	Ⅳ Grade	Ⅴ Grade	26	35	Normal	Abnormal	Abnormal	Abnormal	Normal	Normal
	10	35	39	150.7	58.19	2	105	Ⅴ Grade	Ⅴ Grade	24	31	Abnormal	Abnormal	Abnormal	Abnormal	Normal	Normal
	11	25	40	165.4	47.66	3	96	Ⅰ Grade	Ⅴ Grade	23	33	Normal	Abnormal	Abnormal	Normal	Normal	Normal
	12	36	41	159.3	50.3	2	117	Ⅰ Grade	Ⅲ Grade	26	34	Abnormal	Abnormal	Normal	Abnormal	Normal	Normal
	13	30	41	168.8	54.93	2	115	Ⅱ Grade	Ⅲ Grade	23	33	Abnormal	Normal	Normal	Normal	Normal	Normal
	14	28	39	144.3	61.45	3	68	Ⅲ Grade	Ⅲ Grade	27	38	Abnormal	Abnormal	Abnormal	Normal	Normal	Normal
	15	30	37	157	47.16	3	94	Ⅲ Grade	Ⅴ Grade	26	45	Normal	Normal	Abnormal	Normal	Normal	Normal
	16	28	38	149.7	40.44	2	60	Ⅴ Grade	Ⅴ Grade	25	29	Abnormal	Abnormal	Abnormal	Abnormal	Normal	Abnormal
	17	28	38	179.4	46.37	2	50	Ⅳ Grade	Ⅳ Grade	25	35	Abnormal	Abnormal	Normal	Normal	Normal	Abnormal
	18	32	42	164.4	58.36	2	112	Ⅰ Grade	Ⅴ Grade	25	29	Normal	Normal	Abnormal	Abnormal	Normal	Normal
	19	32	38	168.4	58.75	2	87	Ⅴ Grade	Ⅴ Grade	33	40	Normal	Normal	Abnormal	Normal	Normal	Normal
	20	32	40	150.8	59.16	3	85	Ⅲ Grade	Ⅴ Grade	24	41	Abnormal	Abnormal	Normal	Normal	Normal	Normal
	21	30	39	155.1	55.24	2	112	Ⅰ Grade	Ⅴ Grade	21	28	Abnormal	Abnormal	Abnormal	Normal	Normal	Abnormal
	22	25	40	156.5	57.36	3	103	Ⅴ Grade	Ⅰ Grade	29	43	Abnormal	Abnormal	Normal	Normal	Normal	Normal
	23	30	38	166.3	52.92	3	96	Ⅱ Grade	Ⅳ Grade	26	30	Abnormal	Abnormal	Abnormal	Normal	Normal	Normal
	24	32	37	156.4	61.92	2	122	Ⅴ Grade	Ⅴ Grade	23	36	Normal	Abnormal	Abnormal	Abnormal	Abnormal	Normal
	25	29	37	163.5	46.96	2	113	Ⅲ Grade	Ⅱ Grade	31	39	Normal	Normal	Abnormal	Normal	Normal	Normal
	26	31	40	143.6	59.18	2	93	Ⅳ Grade	Ⅱ Grade	26	35	Abnormal	Abnormal	Abnormal	Normal	Normal	Abnormal
	27	30	39	155.9	50.41	2	67	Ⅱ Grade	Ⅰ Grade	25	44	Abnormal	Abnormal	Normal	Normal	Abnormal	Normal
	28	28	39	152.5	53.87	2	68	Ⅴ Grade	Ⅳ Grade	23	46	Abnormal	Abnormal	Abnormal	Normal	Normal	Normal
	29	29	41	147.1	59.84	3	120	Ⅱ Grade	Ⅳ Grade	22	35	Abnormal	Normal	Normal	Abnormal	Normal	Abnormal
	30	26	40	162.1	63.11	2	41	Ⅳ Grade	0 Level	20	27	Abnormal	Abnormal	Abnormal	Abnormal	Normal	Normal
	31	30	39	160.5	48.6	2	86	Ⅴ Grade	Ⅳ Grade	24	33	Abnormal	Normal	Normal	Normal	Normal	Normal
	32	26	41	158.7	64.6	3	32	Ⅳ Grade	Ⅱ Grade	22	31	Normal	Abnormal	Abnormal	Normal	Normal	Abnormal
	33	26	38	148.8	60.56	2	115	Ⅲ Grade	Ⅰ Grade	26	31	Abnormal	Abnormal	Normal	Abnormal	Normal	Abnormal
	34	26	40	166.6	55.66	3	111	Ⅳ Grade	Ⅲ Grade	24	30	Normal	Abnormal	Abnormal	Normal	Normal	Normal
	35	21	40	161	54.81	3	87	Ⅴ Grade	Ⅲ Grade	29	35	Abnormal	Abnormal	Normal	Normal	Normal	Abnormal
	36	32	39	156.3	54.66	2	85	Ⅱ Grade	Ⅰ Grade	28	44	Abnormal	Abnormal	Normal	Normal	Normal	Abnormal
	37	29	39	158.6	54.08	3	17	Ⅳ Grade	Ⅱ Grade	25	32	Abnormal	Abnormal	Abnormal	Abnormal	Normal	Abnormal	Postpartum hemorrhage
	38	26	38	156.5	56.28	2	103	0 Level	Ⅳ Grade	24	33	Abnormal	Abnormal	Abnormal	Abnormal	Normal	Abnormal
	39	32	38	145.8	56.47	2	25	Ⅰ Grade	Ⅱ Grade	27	40	Normal	Normal	Normal	Normal	Normal	Normal
	40	24	39	156.4	61.68	3	22	Ⅲ Grade	Ⅴ Grade	22	40	Abnormal	Normal	Normal	Abnormal	Normal	Abnormal
	41	28	40	152.4	66.4	3	89	Ⅱ Grade	Ⅳ Grade	26	37	Normal	Abnormal	Abnormal	Normal	Normal	Abnormal	Puerperal infection
	42	28	42	151.4	59.26	3	60	Ⅴ Grade	Ⅳ Grade	23	39	Normal	Abnormal	Normal	Abnormal	Normal	Normal
	43	29	38	150.1	54.71	2	98	Ⅴ Grade	Ⅲ Grade	24	38	Abnormal	Abnormal	Abnormal	Normal	Normal	Normal
	44	29	39	154.6	60.33	2	106	Ⅴ Grade	Ⅳ Grade	23	33	Abnormal	Normal	Normal	Normal	Normal	Abnormal
	45	26	39	144	57.35	3	111	Ⅳ Grade	Ⅲ Grade	26	36	Abnormal	Normal	Abnormal	Normal	Normal	Abnormal
	46	28	37	165.4	49.19	3	67	Ⅱ Grade	Ⅴ Grade	23	33	Abnormal	Abnormal	Normal	Abnormal	Normal	Abnormal
	47	28	39	162.2	62.51	2	99	Ⅴ Grade	Ⅳ Grade	22	31	Abnormal	Abnormal	Normal	Normal	Normal	Normal
	48	30	37	158.3	58.19	2	89	Ⅴ Grade	Ⅳ Grade	26	37	Normal	Abnormal	Abnormal	Normal	Normal	Normal
	49	31	40	158.2	57.03	3	110	Ⅴ Grade	Ⅳ Grade	24	35	Abnormal	Abnormal	Normal	Abnormal	Normal	Normal
	50	31	38	152.7	59.59	2	102	Ⅴ Grade	Ⅴ Grade	25	34	Normal	Abnormal	Abnormal	Normal	Normal	Normal
	51	26	39	165.8	57.88	3	112	Ⅳ Grade	Ⅳ Grade	24	36	Abnormal	Normal	Abnormal	Normal	Normal	Normal
	52	28	38	157.5	49.78	3	83	Ⅰ Grade	Ⅴ Grade	25	39	Abnormal	Abnormal	Abnormal	Normal	Normal	Abnormal

## Sheet: Control group
								Class I and II muscle fiber force grade and pelvic floor muscle potential				Vaginal Microecology
	Number	Age (years)	Gestational age (weeks)	Height (cm)	Weight (kg)	Number of pregnancies	Operation time (min)	Class I muscle fiber strength grade	Class II muscle fiber strength grade	Pelvic floor muscle potential	Pelvic floor dysfunction score	PH	H2O2	LE	SNA	β-GD	NAG	Complication
	1	27	40	166.4	64.16	2	72	Ⅴ Grade	Ⅲ Grade	19	41	Abnormal	Abnormal	Normal	Normal	Normal	Normal
	2	27	39	157.3	60.01	3	108	Ⅰ Grade	0 Level	19	44	Abnormal	Abnormal	Normal	Abnormal	Normal	Abnormal	Puerperal infection
	3	27	39	167.6	62.38	3	48	Ⅳ Grade	Ⅰ Grade	18	37	Abnormal	Normal	Normal	Normal	Normal	Normal
	4	26	39	155.6	61.01	3	33	Ⅰ Grade	Ⅱ Grade	22	40	Normal	Abnormal	Normal	Normal	Normal	Abnormal
	5	27	39	166.4	50.01	2	95	0 Level	Ⅰ Grade	18	37	Abnormal	Abnormal	Normal	Normal	Normal	Normal
	6	28	39	155.7	55.69	3	95	0 Level	Ⅳ Grade	21	44	Abnormal	Normal	Normal	Normal	Normal	Abnormal
	7	28	38	160.7	66.06	2	87	Ⅰ Grade	Ⅱ Grade	22	48	Abnormal	Abnormal	Abnormal	Normal	Normal	Normal
	8	28	39	166.3	58.04	2	97	Ⅱ Grade	Ⅱ Grade	20	40	Normal	Abnormal	Normal	Normal	Normal	Abnormal
	9	30	40	156.5	62	3	113	Ⅲ Grade	Ⅰ Grade	21	44	Normal	Abnormal	Normal	Normal	Normal	Normal
	10	28	39	156.3	51.96	2	110	Ⅰ Grade	Ⅰ Grade	21	40	Normal	Abnormal	Normal	Normal	Normal	Normal
	11	32	41	173.7	58.73	3	69	0 Level	0 Level	20	43	Abnormal	Abnormal	Abnormal	Normal	Normal	Abnormal	Postpartum hemorrhage
	12	29	38	166.2	62.11	2	106	Ⅲ Grade	0 Level	21	48	Abnormal	Abnormal	Normal	Abnormal	Normal	Normal
	13	32	38	156.4	49.72	3	89	Ⅲ Grade	Ⅲ Grade	17	43	Abnormal	Abnormal	Normal	Normal	Normal	Normal
	14	26	37	164.1	60.52	3	71	Ⅲ Grade	Ⅲ Grade	23	38	Abnormal	Normal	Abnormal	Normal	Normal	Normal
	15	29	40	156.9	57.17	3	53	Ⅴ Grade	Ⅴ Grade	18	39	Abnormal	Abnormal	Normal	Normal	Normal	Normal
	16	28	40	164.5	52.38	2	101	Ⅱ Grade	0 Level	16	42	Abnormal	Abnormal	Normal	Normal	Normal	Normal
	17	30	39	169.5	58.08	2	75	Ⅳ Grade	Ⅴ Grade	23	41	Abnormal	Abnormal	Normal	Normal	Normal	Abnormal
	18	30	40	148	46.34	3	85	Ⅳ Grade	Ⅰ Grade	20	38	Abnormal	Abnormal	Normal	Abnormal	Normal	Normal
	19	23	39	166.8	44.87	3	63	Ⅴ Grade	0 Level	21	43	Abnormal	Abnormal	Normal	Normal	Normal	Abnormal
	20	25	39	169.8	50.88	2	43	Ⅰ Grade	Ⅰ Grade	19	48	Abnormal	Abnormal	Normal	Normal	Normal	Normal
	21	25	39	159.8	52.06	2	89	Ⅳ Grade	Ⅰ Grade	18	41	Abnormal	Abnormal	Normal	Abnormal	Normal	Normal
	22	29	39	171.9	50.91	2	83	Ⅰ Grade	Ⅴ Grade	13	41	Abnormal	Abnormal	Abnormal	Normal	Normal	Normal
	23	32	39	160.5	47.42	2	116	Ⅴ Grade	Ⅴ Grade	21	33	Abnormal	Abnormal	Normal	Normal	Normal	Normal
	24	27	42	150.6	60.14	3	105	0 Level	Ⅲ Grade	19	39	Abnormal	Normal	Abnormal	Abnormal	Normal	Normal
	25	30	37	143.8	48.24	2	112	Ⅰ Grade	0 Level	20	36	Normal	Abnormal	Normal	Normal	Normal	Normal
	26	29	37	157.1	59.02	2	65	0 Level	Ⅲ Grade	21	41	Normal	Abnormal	Normal	Normal	Abnormal	Normal
	27	26	37	164.5	63.29	2	60	Ⅳ Grade	0 Level	17	45	Abnormal	Abnormal	Normal	Normal	Normal	Normal
	28	29	37	161.7	58.31	3	51	Ⅰ Grade	Ⅳ Grade	18	49	Normal	Normal	Normal	Normal	Normal	Normal
	29	26	38	162.4	58.91	3	97	Ⅲ Grade	Ⅲ Grade	23	50	Abnormal	Normal	Normal	Normal	Normal	Normal
	30	32	39	155.3	55.93	3	158	Ⅲ Grade	Ⅰ Grade	21	42	Abnormal	Abnormal	Normal	Normal	Normal	Normal
	31	28	39	160.5	48.95	3	103	0 Level	Ⅲ Grade	17	41	Normal	Normal	Normal	Normal	Normal	Normal
	32	32	40	147.8	58.04	2	64	0 Level	0 Level	15	46	Normal	Abnormal	Normal	Normal	Normal	Normal
	33	27	39	154	64.39	3	106	Ⅰ Grade	0 Level	19	45	Abnormal	Abnormal	Abnormal	Abnormal	Normal	Abnormal
	34	30	40	153.6	69.31	3	55	0 Level	0 Level	21	46	Normal	Abnormal	Abnormal	Normal	Normal	Normal
	35	28	41	163.1	55.6	3	47	0 Level	Ⅱ Grade	22	46	Abnormal	Abnormal	Normal	Normal	Normal	Normal
	36	23	41	159.3	48.04	2	103	0 Level	Ⅰ Grade	20	36	Normal	Abnormal	Normal	Normal	Normal	Normal
	37	26	37	151.2	59.37	3	64	Ⅳ Grade	Ⅱ Grade	17	45	Abnormal	Abnormal	Normal	Normal	Normal	Abnormal
	38	30	37	159.4	60.7	2	93	0 Level	Ⅳ Grade	21	42	Abnormal	Abnormal	Normal	Abnormal	Normal	Abnormal
	39	28	40	154.5	56.89	2	121	0 Level	Ⅴ Grade	17	39	Abnormal	Abnormal	Normal	Normal	Normal	Normal
	40	25	36	154.7	51.06	2	95	Ⅱ Grade	Ⅰ Grade	18	39	Abnormal	Normal	Normal	Normal	Normal	Normal
	41	27	39	165.6	71.11	3	109	Ⅱ Grade	Ⅴ Grade	19	48	Abnormal	Abnormal	Normal	Normal	Normal	Normal
	42	29	39	160.2	43.41	2	42	Ⅱ Grade	Ⅱ Grade	17	39	Abnormal	Abnormal	Normal	Abnormal	Normal	Abnormal
	43	26	42	162.3	55.1	2	102	Ⅱ Grade	Ⅱ Grade	19	37	Abnormal	Abnormal	Normal	Normal	Normal	Normal
	44	30	39	165.7	49.97	2	141	Ⅰ Grade	Ⅳ Grade	18	43	Abnormal	Abnormal	Abnormal	Abnormal	Normal	Normal	Postpartum hemorrhage
	45	27	38	160.7	54.3	2	99	Ⅲ Grade	0 Level	19	51	Abnormal	Abnormal	Normal	Normal	Normal	Normal	Abdominal incision infection
	46	32	39	163.4	60.33	1	44	0 Level	0 Level	19	42	Normal	Abnormal	Normal	Abnormal	Normal	Abnormal
	47	26	37	164.3	59.19	2	79	Ⅴ Grade	Ⅴ Grade	19	44	Abnormal	Abnormal	Normal	Normal	Normal	Normal
	48	29	39	167.8	53.83	2	71	Ⅰ Grade	Ⅴ Grade	19	38	Abnormal	Abnormal	Normal	Normal	Normal	Normal
	49	25	38	162.8	63.23	2	94	Ⅳ Grade	Ⅰ Grade	23	50	Abnormal	Abnormal	Normal	Normal	Normal	Normal	Abdominal incision infection
	50	26	37	169.5	62.25	2	95	0 Level	Ⅳ Grade	21	43	Abnormal	Abnormal	Abnormal	Normal	Normal	Normal	Abdominal incision infection
	51	27	39	159.6	62.41	2	95	Ⅱ Grade	Ⅰ Grade	20	45	Abnormal	Abnormal	Normal	Normal	Normal	Normal
	52	29	37	159.1	55.63	3	75	Ⅱ Grade	Ⅳ Grade	17	38	Normal	Abnormal	Abnormal	Normal	Normal	Normal	Abdominal incision infection
	53	30	37	171.5	64.95	2	68	Ⅴ Grade	Ⅲ Grade	16	46	Normal	Abnormal	Normal	Normal	Normal	Normal
	54	29	41	155.8	62.5	2	69	Ⅰ Grade	Ⅰ Grade	16	44	Abnormal	Abnormal	Normal	Normal	Normal	Normal
	55	27	38	159.4	74.18	2	107	0 Level	Ⅰ Grade	26	37	Abnormal	Normal	Normal	Normal	Normal	Normal
	56	30	39	166	65.04	2	35	Ⅱ Grade	Ⅳ Grade	22	43	Abnormal	Normal	Normal	Normal	Normal	Normal
	57	30	40	160.5	65.63	2	79	Ⅱ Grade	Ⅲ Grade	21	40	Abnormal	Abnormal	Abnormal	Normal	Abnormal	Normal
	58	28	38	169.4	58.65	3	91	Ⅰ Grade	Ⅲ Grade	18	43	Abnormal	Normal	Abnormal	Normal	Normal	Abnormal
	59	30	40	166.8	50.18	3	67	Ⅲ Grade	Ⅱ Grade	17	41	Abnormal	Abnormal	Normal	Normal	Normal	Abnormal
	60	29	38	161.5	55.97	3	97	Ⅰ Grade	Ⅳ Grade	21	42	Normal	Abnormal	Abnormal	Abnormal	Normal	Normal
	61	26	40	153.9	53.53	2	82	Ⅰ Grade	Ⅰ Grade	24	38	Normal	Abnormal	Normal	Normal	Normal	Normal
	62	30	40	163.5	54.76	2	60	0 Level	0 Level	16	41	Normal	Abnormal	Normal	Normal	Normal	Abnormal
	63	27	39	149.6	61.83	3	89	Ⅰ Grade	Ⅲ Grade	19	46	Normal	Normal	Normal	Normal	Normal	Normal
	64	27	38	161.2	54.8	3	77	0 Level	Ⅴ Grade	20	50	Normal	Abnormal	Abnormal	Normal	Normal	Normal
	65	29	37	165.2	52.66	3	73	Ⅲ Grade	0 Level	15	37	Normal	Abnormal	Normal	Normal	Normal	Normal
	66	27	38	160.9	55.73	2	66	Ⅱ Grade	Ⅱ Grade	22	53	Abnormal	Abnormal	Normal	Normal	Normal	Normal
	67	28	38	165.7	57.3	3	86	0 Level	Ⅱ Grade	19	49	Abnormal	Normal	Normal	Abnormal	Normal	Normal
	68	30	38	173.9	60.91	2	36	Ⅱ Grade	Ⅴ Grade	24	43	Normal	Abnormal	Normal	Normal	Normal	Normal
